# Supplementary material
Source: publisher site journal article supplement (https://www.dovepress.com/get_supplementary_file.php?f=433338.docx)
Supplement: Supplementary file 1 [file get_supplementary_file.php]

**SUPPLEMENTAL MATERIALS**

**Supplemental Table S1: Current Procedural Terminology coding**

| **CPT Code** | **Procedure** | **Description** |
| --- | --- | --- |
| 92134 | OCT | Scanning computerized ophthalmic diagnostic imaging, posterior segment, with interpretation and report, unilateral or bilateral, retina |
| 92250 | CFP | Fundus photography with interpretation and report |
| 92235 | FA | Fluorescein angiography (includes multiframe imaging) with interpretation and report, unilateral or bilateral |

CFP: color fundus photography, CPT: current procedural terminology; FA: fluorescein angiography, OCT: optical coherence tomography

**Supplemental Table S2. ICD coding for nAMD**

| **ICD Coding** | **Description** |
| --- | --- |
| H35.3211 | Wet (exudative) AMD, with active choroidal neovascularization – right eye |
| H35.3221 | Wet (exudative) AMD, with active choroidal neovascularization – left eye |
| H35.3231 | Wet (exudative) AMD, with active choroidal neovascularization – bilateral |
| H35.3212 | Wet (exudative) AMD, with inactive choroidal neovascularization – right eye |
| H35.3222 | Wet (exudative) AMD, with inactive choroidal neovascularization – left eye |
| H35.3232 | Wet (exudative) AMD, with inactive choroidal neovascularization - bilateral |
| H35.3213 | Wet (exudative) AMD, inactive scar – right eye |
| H35.3223 | Wet (exudative) AMD, inactive scar – left eye |
| H35.3233 | Wet (exudative) AMD, inactive scar - bilateral |
| H35.3291 | Wet (exudative) AMD, with active choroidal neovascularization, unspecified eye |
| H35.3292 | Wet (exudative) AMD, with inactive choroidal neovascularization, unspecified eye |
| H35.3293 | Wet (exudative) AMD, with inactive scar, unspecified eye |

nAMD: neovascular age-related macular degeneration

**Supplemental Table S3. Denominators used for data normalization calculations**

| **Category** | **Distinct patients treated by vitreoretinal specialists from 2018-2020** |
| --- | --- |
| **Year, n (%)** |  |
| 2018 | 3,560,229 |
| 2019 | 3,683,038 |
| 2020 | 3,110,968 |
| **Payer type, n (%)** |  |
| Commercial | 1,984,684 |
| Government | 83,534 |
| Medicaid | 265,022 |
| Medicare Fee-for-Service | 1,777,931 |
| Medicare Advantage | 1,097,195 |
| Military | 67,395 |
| **Region, n (%)** | |
| Midwest | 1,040,252 |
| South | 2,422,146 |
| West | 1,212,563 |
| Northeast | 1,201,883 |
| **Practice type, n (%)** |  |
| Small Practice | 761,008 |
| Medium Practice | 2,389,414 |
| Large Practice | 2,185,602 |
| Private Equity | 610,843 |
| AMC | 232,186 |

AMC: academic medical center
